# Supplementary material
Source: publisher figshare collection journal article supplement (https://acs.figshare.com/ndownloader/files/4763305)
Supplement: Supplementary file 1 [file 4763305]

# Hydroxylamine as an oxygen nucleophile. Structure and reactivity of ammonia oxide

A. J. Kirby,\* J. E. Davies, T. A. S. Brandão, P. F. da Silva, W. R. Rocha, F. Nome\*

## Electronic Supporting Information

### 1. Details of the crystallography.

#### 2. Calculations. Tables S1 – S4.

Calculated geometries and energies for hydroxylamine, ammonia oxide and hydroxylamine hydrochloride, in the gas phase and with solvation by water molecules.

### 1. Details of the crystallography.

**The crystals** were first obtained from the decomposition of 2-chloroaceto-hydroxamic acid in solution in alcohol at pH 6. They are best prepared by mixing equal volumes of 1 M  $\text{NH}_2\text{OH}\cdot\text{HCl}$  and 0.5 M KOH in hot methanol, giving a solution containing equal quantities of  $\text{NH}_2\text{OH}$  and its hydrochloride. After filtering off the KCl which immediately precipitates, slow evaporation of the solvent at room temperature gives colorless crystals, mp 86-87°C. These show two well-resolved  $^{15}\text{N}$  (natural abundance) signals, at -312.7 and -314.6 ppm (relative to  $\text{NO}_3^-$ ) in the solid state NMR.

**Crystal data:**  $\text{ClH}_7\text{N}_2\text{O}_2$ ,  $M_w=102.53$ , colourless prism  $0.35\times 0.18\times 0.07\text{mm}^3$ , monoclinic P21/c (No. 14),  $a=7.2167(1)$ ,  $b=8.1338(2)$ ,  $c=7.0381(2)\text{Å}$ ,  $\beta=92.35(1)^\circ$ ,  $Z=4$ ,  $V=412.79(2)\text{Å}^3$ ,  $T = 120(2)\text{K}$ ,  $D_X = 1.650\text{ g cm}^{-3}$ ,  $\lambda = 0.71073\text{ Å}$ ,  $\mu = 0.762\text{ mm}^{-1}$ , Nonius Kappa CCD diffractometer equipped with an Oxford Cryosystems Cryostream cooling apparatus,  $3.78^\circ < \theta < 45.27^\circ$ , 12868 measured reflections, 3441 independent ( $R_{\text{int}}=0.025$ ), 3071 with  $I > 2\sigma(I)$ . The structure was solved by direct methods (SHELXS-97) and refined by least squares (SHELXL-97) using Chebyshev weights on  $F_o^2$  to  $R_1 = 0.023$ ,  $wR_2 = 0.056$  ( $I > 2\sigma(I)$ ), 53 parameters, goodness-of-fit on  $F^2$  1.083, residual electron density  $0.39\text{ e Å}^{-3}$ . All hydrogen atoms were located unambiguously in the final difference map. For the refinement, the  $-\text{NH}_3$  groups were treated as rigid groups with idealized tetrahedral geometry and the hydrogen atoms of these groups were assigned a common isotropic displacement parameter (there are no significant differences if the structure is refined without these restraints). The coordinates of the  $-\text{OH}$  hydrogen atom were refined successfully without any restraints.

Further details of the crystal-structure investigation may be obtained from the Fachinformationszentrum Karlsruhe, 76344 Eggenstein-Leopoldshafen, Germany (fax (+49) 7247-808-666; e-mail [crysdata@fiz-karlsruhe.de](mailto:crysdata@fiz-karlsruhe.de)) on quoting the deposition number CSD-415541.

## 2. Calculations

### Geometries of 1 and 1z in the gas phase and in the presence of solvating H<sub>2</sub>O

**Table S1.** B3LYP/6-311++G(d,p) geometries for hydroxylamine and ammonia oxide in the gas phase,<sup>a</sup> and PCM/B3LYP/6-311++G(d,p) single-point energies for the optimized structures.

|                                                                                       | <b>H<sub>2</sub>NOH</b> | <b>H<sub>3</sub>NO<sup>b</sup></b> |
|---------------------------------------------------------------------------------------|-------------------------|------------------------------------|
| <i>R</i> (N-O)                                                                        | 1.444                   | 1.367                              |
| <i>R</i> (O-H)                                                                        | 0.963                   |                                    |
| <i>R</i> (N-H)                                                                        | 1.018                   | 1.034                              |
| $\theta$ (N-O-H)                                                                      | 102.8                   |                                    |
| $\theta$ (H-N-O)                                                                      | 104.2                   | 113.1                              |
| $\theta$ (H-N-H)                                                                      | 106.2                   |                                    |
| <i>q</i> (H <sub>a</sub> )                                                            | 0.250                   | 0.281                              |
| <i>q</i> (H <sub>b</sub> )                                                            | 0.278                   |                                    |
| <i>q</i> (N)                                                                          | -0.496                  | -0.365                             |
| <i>q</i> (O)                                                                          | -0.281                  | -0.478                             |
| $E_{\text{elec}}^{\text{b}}$                                                          | -131.766887             | -131.728118                        |
| $G^{\text{b}}$                                                                        | -131.749030             | -131.710051                        |
| $E_{\text{elec}}^{\text{PCM, b}}$                                                     | -131.781612             | -131.764816                        |
| $G_{\text{nuclear}}^{\text{corr}}$                                                    | -82.67                  | -82.00                             |
| $\Delta G_{\text{sol}} = E_{\text{elec}}^{\text{sol}} - E_{\text{elec}}^{\text{gas}}$ | -9.24                   | -23.03                             |
| $\Delta E_{\text{elec}}$                                                              | 24.3                    |                                    |
| $\Delta G_{\text{nuclear}}$                                                           | 0.67                    |                                    |
| $\Delta G^{\circ} = \Delta G_{\text{nuclear}} + \Delta E_{\text{elec}}$               | 25.0                    |                                    |
| $\Delta \Delta G_{\text{solv}}$                                                       | -13.8                   |                                    |
| $\Delta G_{\text{sol}}^{\circ} = \Delta G^{\circ} + \Delta \Delta G_{\text{solv}}$    | 11.2                    |                                    |

<sup>a</sup> Bond lengths in Å, angles in deg. <sup>b</sup> C<sub>3v</sub> symmetry.

These values are comparable with literature values.<sup>[1,3]</sup>

**Table S2. B3LYP/6-31+G(d) geometries for hydroxylamine and ammonia oxide with six water molecules included explicitly as the first solvation shell, <sup>a</sup>and PCM/B3LYP/6-31+G(d) single-point energies for the optimized structures (shown below).**

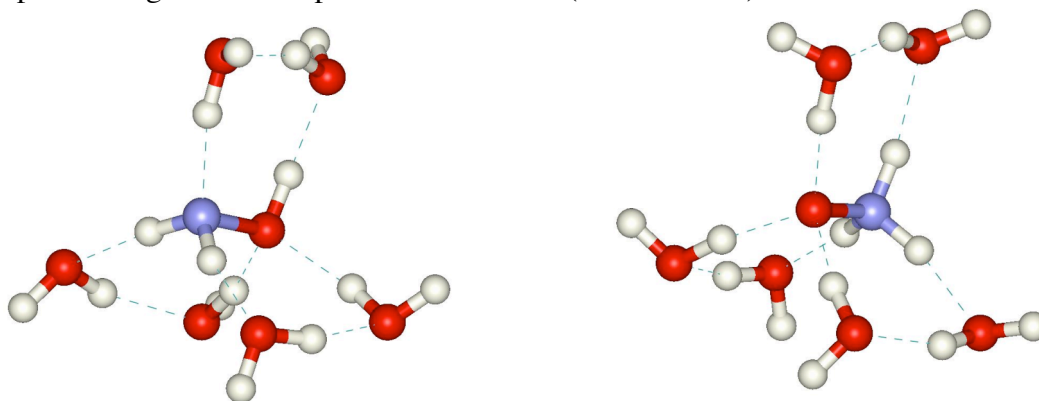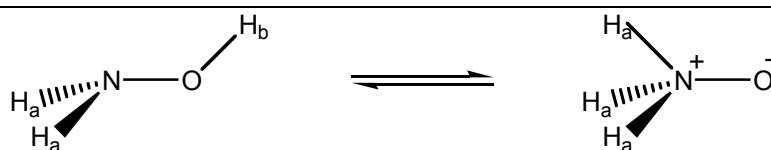

|                                   | <b>H<sub>2</sub>NOH</b> | <b>H<sub>3</sub>NO</b>    |
|-----------------------------------|-------------------------|---------------------------|
| <i>R</i> (N-O)                    | 1.460                   | 1.419 <sup>b</sup>        |
| <i>R</i> (O-H)                    | 0.995                   |                           |
| <i>R</i> (N-H)                    | 1.028                   | 1.041                     |
| $\theta$ (N-O-H)                  | 104.1                   |                           |
| $\theta$ (H-N-O)                  | 103.8                   | 109.4                     |
|                                   | 104.5                   | 109.5, 109.7              |
| $\theta$ (H-N-H)                  | 107.7                   | 110.0, 108.9, 109.4       |
| <i>q</i> (H <sub>a</sub> )        | 0.484                   | 0.524                     |
| <i>q</i> (H <sub>b</sub> )        | 0.603                   |                           |
| <i>q</i> (N)                      | -0.876                  | -0.892                    |
| <i>q</i> (O)                      | -0.713                  | -0.680                    |
| $E_{\text{elec}}^{\text{b}}$      | -590.3485852            | -590.3552879              |
| $E_{\text{elec}}^{\text{PCM, b}}$ | -590.3828816            | -590.3899498              |
| $\Delta E_{\text{elec}}$          | -4.21                   | <b>K(calc) = 1.73 e-3</b> |
| $\Delta E_{\text{PCM/B3LYP}}$     | -4.44                   | <b>K(calc) = 1.22 e-3</b> |

<sup>a</sup> Bond lengths in Å, angles in deg. <sup>b</sup> Cf. the value of 1.417(1) in the crystal.

**Table S3. B3LYP/6-31+G(d) geometry of hydroxylammonium in the gas phase, with four water molecules explicitly included in the first solvation-shell.<sup>a</sup>**

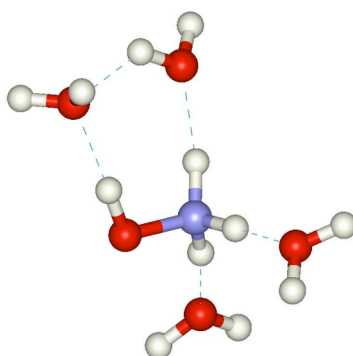

| <b>H<sub>3</sub>N<sup>+</sup>OH</b> |                     |
|-------------------------------------|---------------------|
| <i>R</i> (N-O)                      | 1.418 <sup>b</sup>  |
| <i>R</i> (O-H)                      | 0.990               |
| <i>R</i> (N-H)                      | 1.042               |
| $\theta$ (N-O-H)                    | 106.1               |
| $\theta$ (H-N-O)                    | 105.2, 109.2, 109.9 |
| $\theta$ (H-N-H)                    | 110.7, 110.9, 110.9 |

<sup>a</sup> Bond lengths in Å and angles in deg. <sup>b</sup> Cf. the value of 1.415(2) in the crystal

**Table S4. Calculated energetics (kcal/mol) for the tautomeric process NH<sub>2</sub>OH → NH<sub>3</sub>O in the gas phase and in aqueous solution, at different levels of theory.**

| Method                                           | Gas Phase  |            | Aqueous solution                                |                                                 |
|--------------------------------------------------|------------|------------|-------------------------------------------------|-------------------------------------------------|
|                                                  | $\Delta E$ | $\Delta G$ | $\Delta G(soln.)$<br>Rigid charges <sup>a</sup> | $\Delta G(soln.)$<br>PCM polarized <sup>b</sup> |
| B3LYP <sup>22</sup> /6-311++G(d,p) <sup>23</sup> | 24.33      | 24.45      | 5.69                                            | -5.20                                           |
| MP2//B3LYP/6-311++G(d,p)                         | 27.69      | 27.82      | 9.06                                            | -1.83                                           |
| MP4(SDTQ)// B3LYP/6-311++G(d,p)                  | 27.47      | 27.60      | 8.84                                            | -2.05                                           |
| CCSD(T) <sup>24</sup> // B3LYP/6-311++G(d,p)     | 25.93      | 26.06      | 7.30                                            | -3.59                                           |

<sup>a</sup>  $\Delta G(soln.)$  is the sum of  $\Delta G(g)$  computed at the specified level of theory and  $\Delta\Delta G_{solv}(NH_2OH \rightarrow NH_3O)$  calculated with the charges kept rigid on going from the gas phase to solution.

<sup>b</sup>  $\Delta G(soln.)$  is the sum of  $\Delta G(g)$  computed at the specified level of theory and  $\Delta\Delta G_{solv}(NH_2OH \rightarrow NH_3O)$  calculated with free energy perturbation, using PCM polarized charges.

#### References.

(22) Becke, A. D. *J. Chem. Phys.* **1993**, 98, 5648.

(23) (a) Ditchfield, R.; Hehre, W. J.; Pople, J. A. *J. Chem. Phys.* **1971**, 54, 724. (b) Hehre, W. J.; Ditchfield, R.; Pople, J. *J. Chem. Phys.* **1972**, 56, 2257.

(24) (a) Purvis, G. D.; Bartlett, R. J. *J. Chem. Phys.* **1982**, 76, 1910. (b) Urban, M.; Noga, J.; Cole, S. J.; Bartlett, R. J. *J. Chem. Phys.* **1985**, 83, 4041.
